# Supplementary material for: Hydrological characterization of cave drip waters in a porous limestone: Golgotha Cave, Western Australia
Source: Copernicus journal article supplement (doi:10.5194/hess-2017-127), 2017-06-06
Supplement: Supplementary file [file hess-2017-127-RC1-supplement.pdf]

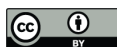

# 1 Hydrological characterization of cave drip waters in a porous 2 limestone: Golgotha Cave, Western Australia

3 Kashif Mahmud<sup>1</sup>, Gregoire Mariethoz<sup>2</sup>, Andy Baker<sup>3</sup>, Pauline C. Treble<sup>4</sup>

4 <sup>1</sup>Hawkesbury Institute for the Environment, Western Sydney University, Australia

5 <sup>2</sup>Institute of Earth Surface Dynamics, University of Lausanne, Switzerland

6 <sup>3</sup>Connected Waters Initiative Research Centre, UNSW Australia, NSW, Australia

7 <sup>4</sup>Australian Nuclear Science and Technology Organisation, Lucas Heights, NSW, Australia

8 *Correspondence to:* Kashif Mahmud ([k.mahmud@westernsydney.edu.au](mailto:k.mahmud@westernsydney.edu.au))

## 9 Abstract

10 Cave drip water response to surface meteorological conditions is complex due to the heterogeneity of water  
11 movement in the karst unsaturated zone. Previous studies have focused on the monitoring of fractured rock  
12 limestones that have little or no primary porosity. In this study, we aim to further understand infiltration water  
13 hydrology in the Tamala Limestone of SW Australia, which is Quaternary aeolianite with primary porosity. We  
14 build on our previous studies of the Golgotha Cave system and utilize the existing spatial survey of 29  
15 automated cave drip loggers and a LiDAR-based flow classification scheme, conducted in the two main  
16 chambers of this cave. We find that a daily sampling frequency at our cave site optimizes the capture of drip  
17 variability with least possible sampling artifacts. Most of the drip sites show persistent autocorrelation for at  
18 least a month. Drip discharge histograms are highly variable, showing sometimes multimodal distributions.  
19 Histogram skewness is shown to relate to the wetter than average 2013 hydrological year and modality is  
20 affected by seasonality. Finally, a combination of Multi-dimensional scaling (MDS) and clustering by k-means  
21 is used to classify similar drip types based on time series analysis. This clustering reveals four unique drip  
22 regimes which agree with the flow type classification of Mahmud et al. (2016) for this site. It highlights a spatial  
23 homogeneity in drip types in one cave chamber, and spatial heterogeneity in the other, which is in concordance  
24 with our understanding of cave chamber morphology and lithology. Our hydrological classification scheme with  
25 respect to mean discharge and the flow variation, can distinguish between groundwater flow types in limestones  
26 with primary porosity, and the technique could be used to characterize different karst formations when high-  
27 frequency automated drip logger data are available. We observe little difference in the Coefficient of variation  
28 (COV) between flow classification types, probably reflecting the dominance of primary porosity at this cave  
29 site, and the seasonal variations in discharge related to storage replenishment in winter followed by recession in  
30 the periods of soil moisture deficit. Moreover, we do not find any relationship between drip variability and  
31 discharge within similar flow type.

32

33 **Keywords:** karst aquifers, drip loggers, infiltration, cave drip water

34



## 35 1. Introduction

36 Karst features in limestone are typically developed from the solutional dissolution of fractures and bedding  
37 planes in carbonate rocks (Arbel et al. 2010). Worldwide, karst regions represent significant geographical areas  
38 with potentially high rates of infiltration through fractured and karstified carbonate rocks. The most usual  
39 recharge method in karstic aquifers is the faster infiltration through the deep karstic openings (Ford and  
40 Williams 2007). Complex spatial spreading of various karst features such as solutionally widened fractures,  
41 caves and conduits, makes the monitoring and precise groundwater recharge modeling very difficult (Lange et  
42 al. 2003) and (Arbel et al. 2010). The upper part of karstified rock (the epikarst zone) has higher permeability  
43 than the underlying vadose zone (Klimchouk 2004). Therefore, infiltration into the epikarst zone is faster  
44 compared to the drainage through it, and water is kept stored in this region. This stored water in the vadose zone  
45 seeps slowly and finally emerges inside caves as infiltrating drip waters (Williams 1983).

46 Karstic features such as speleothems, commonly used to reconstruct paleo-environmental records, are formed  
47 due to calcite deposition from cave drip water. Therefore, the knowledge of drip water hydrology is critical to  
48 study the paleoclimatic records (Baldini et al. 2006). An early study using tipping bucket loggers formulated a  
49 relationship between maximum discharge and coefficient of variation of discharge to categorize cave discharges  
50 (Smart and Friederichs (1987), for a fractured-rock limestone system with a vertical range of approximately 140  
51 m (GB Cave, Mendip Hills, UK). They found that the drips close to the surface have extreme coefficient of  
52 variations, whereas the drips in depths have fairly constant flow rates over time, with a significant possibility of  
53 water storage in vadose zone fractures. Thus the stalagmite record resulting from slower drips may be more  
54 closely related to the karst hydrology rather than palaeoclimate (Baldini et al. 2006). Quantitative analysis of  
55 such stalagmite drip data has, in the past, used manual observations of cave drips (e.g. Baker et al 1997).  
56 However, the recent development of automatic cave drip loggers (Collister and Matthey 2008) has enabled the  
57 generation of high temporal resolution and continuous drip discharge time-series (e.g. (Jex et al. 2012),  
58 (Cuthbert et al. 2014), (Markowska et al. 2015), (Mariethoz et al. 2012)), providing new opportunities for  
59 quantitative hydrological analysis.

60 Here we present monitoring data from Golgotha Cave located in SW Western Australia that has been  
61 extensively monitored since 2005, with the aim of better understanding karst drip water hydrogeology and the  
62 relationship between drip hydrology and surface climate. We build on the work of Mahmud et al. (2016), which  
63 presented the largest spatial and temporal survey of automated cave drip monitoring with matrix (primary)  
64 porosity published to date. This previous study consisted of data from two large chambers within this cave,  
65 measured in the period from 2012 to 2014, using a highly spatially (29 sites in two separate chambers) and  
66 temporally (0.001 Hz, 15 min intervals) resolved dataset and developed a recharge estimation technique for  
67 caves using the drip data and flow classification techniques of Mahmud et al. (2015). Mahmud et al. (2015)  
68 performs morphological analysis of karstic features, based on ground-based LiDAR data, to identify different  
69 flow processes in karstified limestone. Based on the findings of Mahmud et al. (2016), Mahmud et al. (2015),  
70 here we investigate the relationship between drip water hydrology and cave depth, spatial location and stalactite  
71 type, and develop a hydrological classification scheme that is appropriate to high-frequency drip logger data and  
72 limestones with a primary porosity. This classification scheme is also compared with previous studies (Baker et



73 al. 1997, Smart and Friederich 1987) to examine the limitations of these previous schemes. These findings will  
74 also help better characterize and understand water movement in highly porous karst formations.

75 Finally we use a combination of multi-dimensional scaling (MDS) and the popular K-Means algorithm for  
76 clustering similar drip characteristics. Time series clustering has been shown to be effective in providing useful  
77 information in various domains (Liao 2005) and is implemented here to determine the degree of similarity  
78 between two drip time series. There seems to be an increased interest in time series clustering as part of the  
79 research effort in temporal data mining. The method we use here is suitable for large datasets, has been studied  
80 extensively in the past and achieves good results with minimum computational cost (Borg and Groenen 1997,  
81 Jex et al. 2012, Scheidt and Caers 2009).

## 82 2 Site Description

### 83 2.1 Studied Cave

84 The cave site has been explained in detail by Mahmud et al. (2016), Mahmud et al. (2015), Treble et al. (2013).  
85 Briefly, the field site, Golgotha Cave is 200 m in length and up to 25 m in width (Figure 1), is developed in  
86 Quaternary aeolianite, which consists of wind-blown calcareous sands that were deposited along the southwest  
87 coast of Australia (Brooke et al., 2014). Vadose zone water flow, and subsequent widening by ceiling collapse,  
88 formed the cave chamber. Treble et al. (2013) described the cave site as developed in the Spearwood System of  
89 the Tamala Limestone and is mantled by a variable thick layer of sand formation having depths of between 0.3  
90 m and 3 m. Diffuse (or matrix) flow is likely to be dominant in the Tamala Limestone formation due to its high  
91 matrix porosity (Smith et al. 2012). Karst in this region is also called “syngenetic” (Treble et al. 2013) that  
92 implies processes like preferential vertical dissolution and varying morphology of the subsurface caprock. These  
93 processes may establish vadose-zone preferential flow extending to the cave ceiling, with occasional rapid  
94 delivery of percolating waters deep into the calcarenite which end up seeping through to the cave ceiling.  
95 Therefore, this young limestone formation offers various opportunities for preferential flow into the hostrock  
96 and storage within it (Brooke et al. 2014). Golgotha Cave was chosen because (a) it is located in an intensively  
97 studied karst area (e.g.,(Mahmud et al. 2016, Mahmud et al. 2015, Treble et al. 2013, Treble et al. 2016, Treble  
98 et al. 2015)), which has 9 years of manual and 3 years of automated drip water monitoring, (b) it contains  
99 actively growing speleothems, and (c) it is accessible year-round.

100 Based on the findings of Treble et al. (2013) and the morphological analysis of stalactite clusters by Mahmud et  
101 al. (2015), combined with the classification of drip rate data from the underlying drip sites (Mahmud et al.  
102 2016), we determined previously that chamber 1 (Figure 1b and c) is mostly dominated by matrix flow  
103 representing water flowing down and seeping through the rock matrix, characterised by both icicle-shape and  
104 soda straw stalactites with slow drip rates of low variability. In contrast, chamber 2 (Figure 1b and d) is typically  
105 controlled by fracture and combined flow, with high drip rates that are shown to vary over time depending upon  
106 the mode of water delivery to the preferential flow system. In fracture flow, water moves along the fracture  
107 orientation, forming curtain-shape stalactites in the direction of highest fracturing. Finally, combined flow is  
108 defined as the combination of conduit, matrix and fracture flow, resulting in a circular pattern of stalactite  
109 formation.

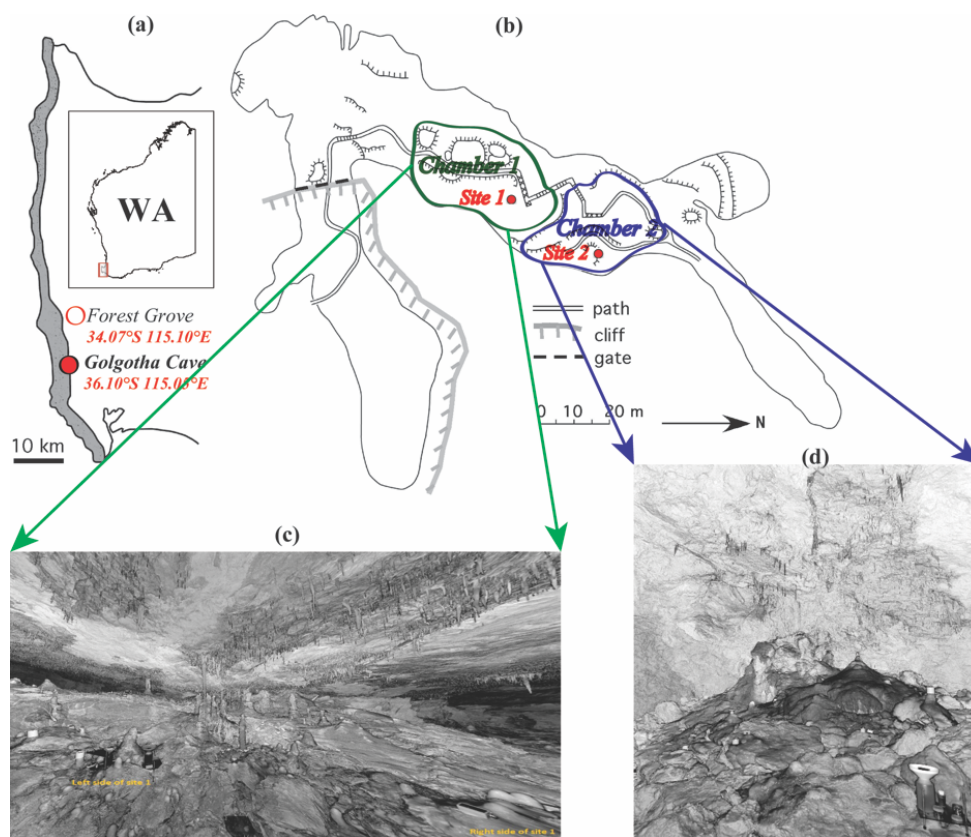

110  
111 Figure 1: (a) Coastal belt of SWWA (South-West Western Australia). (b) Golgotha cave plan view displaying  
112 both Chamber 1 (green marked area), that comprises Site 1 and Chamber 2 (blue marked area) containing Site 2.  
113 Average limestone thickness from cave ceiling to ground surface over Site 1 and 2 are 32.33 m and 40.24 m  
114 respectively. (c) Site 1 LiDAR image and (d) Site 2 LiDAR image. (Fig. adapted from Mahmud et al. (2016)  
115 and Mahmud et al. (2015))

## 116 2.2 Climate and Meteorology

117 A comprehensive description of the climate at our study site has been presented in Mahmud et al. (2016),  
118 Mahmud et al. (2015), Treble et al. (2013). To summarize, the site is in Mediterranean climate, associated with  
119 wet winters and dry summers. Annual rainfall recorded at Forest Grove weather station (Figure 1A, 5 km away  
120 from the study site) is  $1136.8 \pm 184$  mm, among which  $\sim 75\%$  occurs between May and September, with an  
121 average daily maximum temperature variation from  $16^{\circ}\text{C}$  (in July) to  $27^{\circ}\text{C}$  (in February) (BoM 2015).  
122 Typically, the peak rainfall begins in late autumn (May) and the wet season continues until end of September  
123 with a median monthly rainfall of  $\sim 100$  mm (Figure 2). Weekly rainfall data are shown in Fig. 2a for three  
124 hydrological years. Each hydrological year is defined as April to March, as April has the lowest water budget.

125 As reported in Mahmud et al. (2016), hydrological year 2012 had roughly similar annual rainfall of 1008.6 mm  
126 to the long-term annual mean, whereas 2013 was rather wet (total rainfall of 1239.8 mm) and 2014 was a



127 relatively dry year with a total rainfall of 943.8 mm. Recorded rainfall was significantly above average in the  
128 2013 hydrological year for various weather stations in Western Australia (BoM 2015). Therefore, our site had a  
129 wetter winter in 2013 (Fig. 2b) with an estimated annual recharge of 858.67 mm which is very much above  
130 average (ten year mean annual recharge is 564 mm).

131 We use the Australian Water Availability Project (AWAP) precipitation (P) and modelled evapotranspiration  
132 (ET) data to estimate both cumulative water budgets and total infiltration from April 2012 to March 2015  
133 (Raupach et al. 2009). Weekly calculated ET was subtracted from the weekly rainfall totals to determine the  
134 weekly water budget (Figure 2a). Annual infiltration is estimated by summing all positive weekly water budgets  
135 and a smooth spline interpolation trend is plotted through those points (Figure 2a, pink line). All hydrological  
136 years have water deficit during the dry season (October to April) and significant infiltration during the wet  
137 period (Figure 2a). Low evaporative conditions during winter should permit increased infiltration to the caves,  
138 enhancing the drip discharge response to winter rainfall.

### 139 3 Drip data acquisition and characteristics

140 Data acquisition and pre-processing has been previously described in Mahmud et al. (2016) and is concisely  
141 summarized here. Stalagmate drip loggers ([www.driptych.com](http://www.driptych.com)) were set up in approximate transects throughout  
142 the two large chambers from higher to lower ceiling elevation in 34 locations and are currently being monitored  
143 since August 2012. Each chamber has contrasting discharge, dune facies and karst features of Golgotha Cave  
144 (Figure 3). Data loggers were set to record continuously at 15 minute intervals. The notation used for site  
145 identification follows the same style as described in Mahmud et al. (2016), consisting of a numerical number  
146 (represents the chamber) and a letter/roman number (represents a drip site within the given chamber, with a  
147 letter indicates the sites having both manual and automatic drip counts and a roman number specifies the sites  
148 only having drip logger data).

149 Based on the initial data screening of Mahmud et al. (2016), we entirely discard five drip sites i.e. 1iv, 1vii, 1xii,  
150 2ii and 2xii. We observe that some of these drip sites (1iv, 2ii and 2xii) contain abrupt changes in drip rate and  
151 that is probably not recording an actual change in discharge, rather due to the logger being accidentally moved  
152 or misaligned. Some other loggers (1vii and 1xii) were removed part way through the monitoring period due to  
153 either recording dual drips or a cessation of dripping and ignored in full. The rest of the 29 sites are considered  
154 in the time series analysis although short periods of poor quality data were omitted if they were associated with  
155 changes in the mean and variability at the time of fieldwork. This impacted sites 1A, 1B, 2A, 2B, 2E as the  
156 logger was temporarily placed aside every 6 weeks in order to sample water from a collection bottle underneath  
157 the logger. Time series gaps are filled with synthetic data based on the drip statistics and correlation between  
158 drip rates. The processed drip rate time series for all the sites and three hydrological years from April 2012 to  
159 March 2015 are plotted in Figure 2c-f.

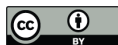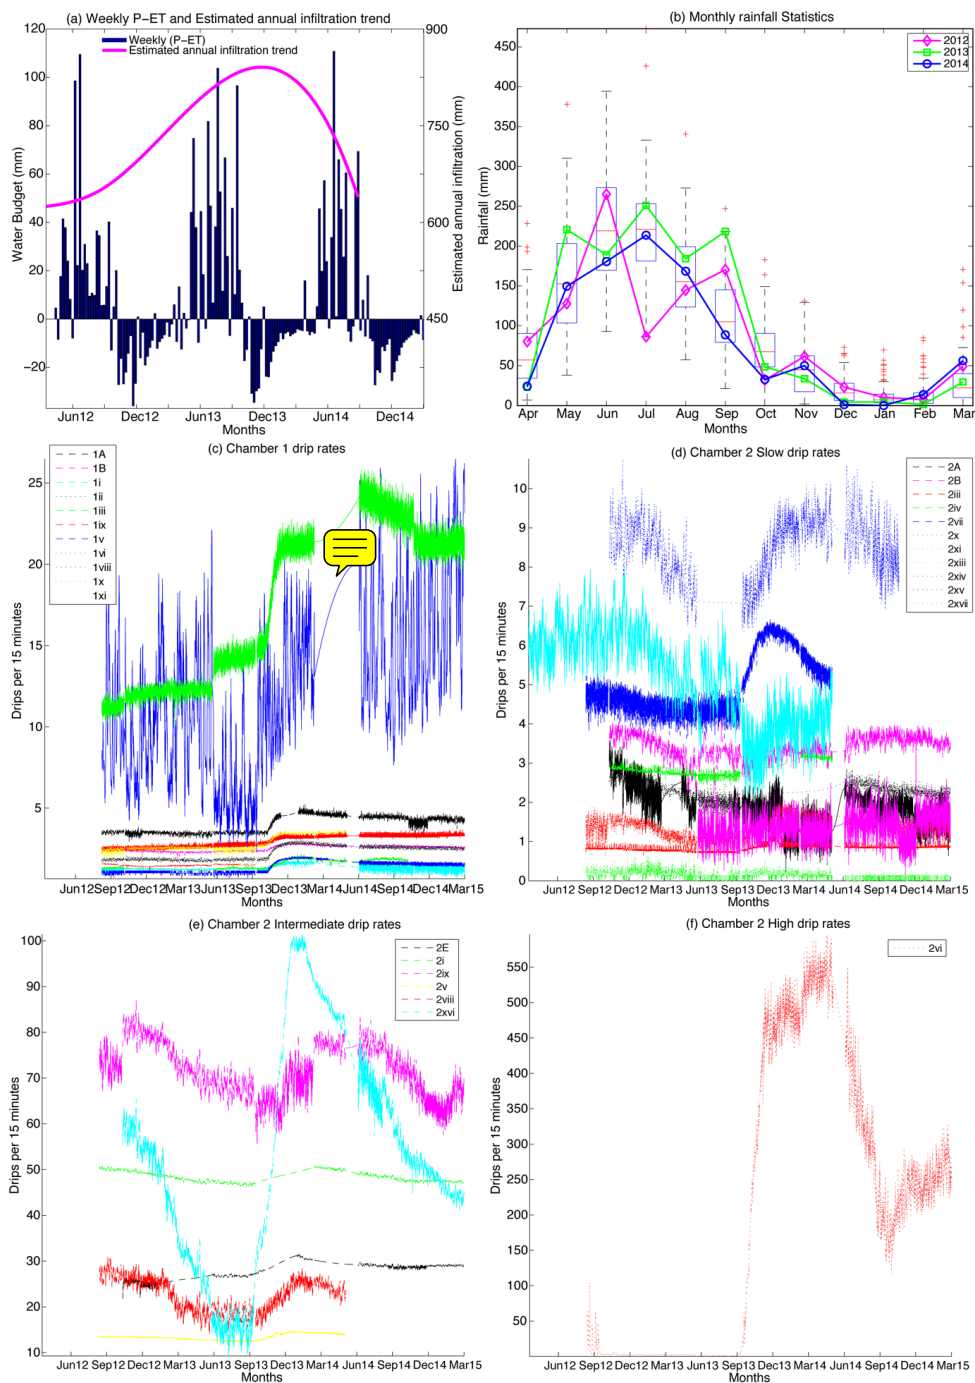

160

161 Figure 2: (a) Weekly water excess data for three hydrological years with estimated annual infiltration pattern.  
 162 (b) Box plot of monthly rainfall at Golgotha Cave site, (c) Chamber 1 drip rates time series. Further





163 classification of Chamber 2 drip sites for effective time series visualization: (d) slow flow rates with drip  
164 frequency of less than 10 drops per 15 mins, (e) medium discharges with drip frequency of between 10 to 100  
165 drops per 15 mins, and (f) fast drip rates of more than 100 drops per 15 mins. (Fig. is adapted from Mahmud et  
166 al. (2016)).

167 Drip rates were also measured manually at five different sites (the location of Sites 1A, 1B, 2A, 2B and 2E  
168 shown in Figure 3) within both chambers at 4-6 week intervals using a stopwatch since 2005, however such  
169 measurements were superseded in May 2014 by the Stalagmate loggers (Treble et al. 2013). Sites 1A and 1B are  
170 located ~60 m into the cave and are approximately 0.5 m apart. Sites 2A, 2B and 2E are located ~30 m further  
171 into the cave in Chamber 2. Site 2E is located in the wettest area close to the lowest point at which the ceiling  
172 and wall intersect, whilst 2B and 2A are located on each transect, approximately 5-6 m from Site 2E. A surface  
173 soil auger survey by Treble et al. (2013) at points immediately above Chamber 2 revealed that soil depth was  
174 particularly deep above this area, which could reflect the presence of a soil-filled doline-type structure. We use  
175 these available manual drip data for quality assurance of loggers automatic drip rates for the two hydrological  
176 years (August 2012 to May 2014). Drip rates recorded by the loggers tend to match the manual data for these  
177 drip sites, with slight variations in absolute value between manual and logger data for the slow dripping sites  
178 due to 15 minutes sampling intervals.

179 Drip rates in Chamber 1 are generally very low (the fastest drip rate was 25 drips per 15 mins) consistent with  
180 the predominance of matrix flow in this chamber. However, it is obvious that most drip loggers exhibit a clear  
181 response to the 2013 wet winter, presenting peak discharges at the end of September 2013 (Figure 2) and also  
182 indicate the substantial inter-annual variation in discharge between three hydrological years. All chamber 1 drip  
183 sites (except site 1x) show a gradual drip rate decrease during summer 2012 to winter 2013 due to below  
184 average rainfall in 2012 that produces high water deficit (Figure 2). Then after displaying the sudden increase in  
185 all drip discharges that express the 2013 wet winter, the drip rates further reduce due to the dry 2014  
186 hydrological year. This intra-annual variation is identified much greater than the inter-annual discharge variation  
187 of the drip sites, as previously observed in Baker et al. (1997). This suggests that high-resolution intra-annual  
188 drip rate data is helpful to obtain a complete picture of changing flow variability with recharge. The high  
189 resolution of the data sets includes precise characterization of the temporal behavior of an individual drip,  
190 illustrating the differences inherent to the drip sites.

191 In contrast, Chamber 2 drip rates present more variability between sites both in intra-annual and inter-annual  
192 discharges, except few very slow dripping sites (Figure 2d). To envisage the drip time series efficiently, they  
193 were further divided into three classes on the basis of their flow behavior through the three-year study period  
194 (Mahmud et al. 2016): (i) slow drips with little discernable variation through time and very low flow rates  
195 (Figure 2d), (ii) medium-variability drips with moderate discharges (Figure 2e), and (iii) high-variability drips  
196 with high discharges (Figure 2f).

197 Of the Chamber 2 drips, the slow drip sites have the lowest COVs and lowest discharges (Figure 2d), indicative  
198 of matrix flow types (Mahmud et al., 2016). Drip rates at intermediate sites (Figure 2e) are considerably greater  
199 (typically  $\times 10$ ) than those of slow dripping sites (Figure 2d). The drip site 2vi has the maximum discharge from  
200 all drip sites, with 550 drips per 15 mins peaking in response to the wet 2013 winter (Figure 2f). The timing of

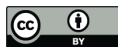

201 maximum drip rates is generally delayed in Chamber 2 versus Chamber 1: Chamber 1 drip rates typically peak  
202 in late spring/early summer (Oct-Dec) while Chamber 2 drips tend to peak a few months later (Dec-May),  
203 reflecting a longer water residence time (Figure 2c-f). This may be a function of the thicker ceiling above  
204 Chamber 2 (40.24 versus 32.33 m) but also heterogeneity in flowpaths to each chamber (Mahmud et al., 2015;  
205 Treble et al., 2016). Overall the drip response to the 2013 wet winter is amplified in Chamber 2 versus Chamber  
206 1, consistent with the presence of greater fracture flow in Chamber 2 (Mahmud et al., 2015).



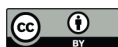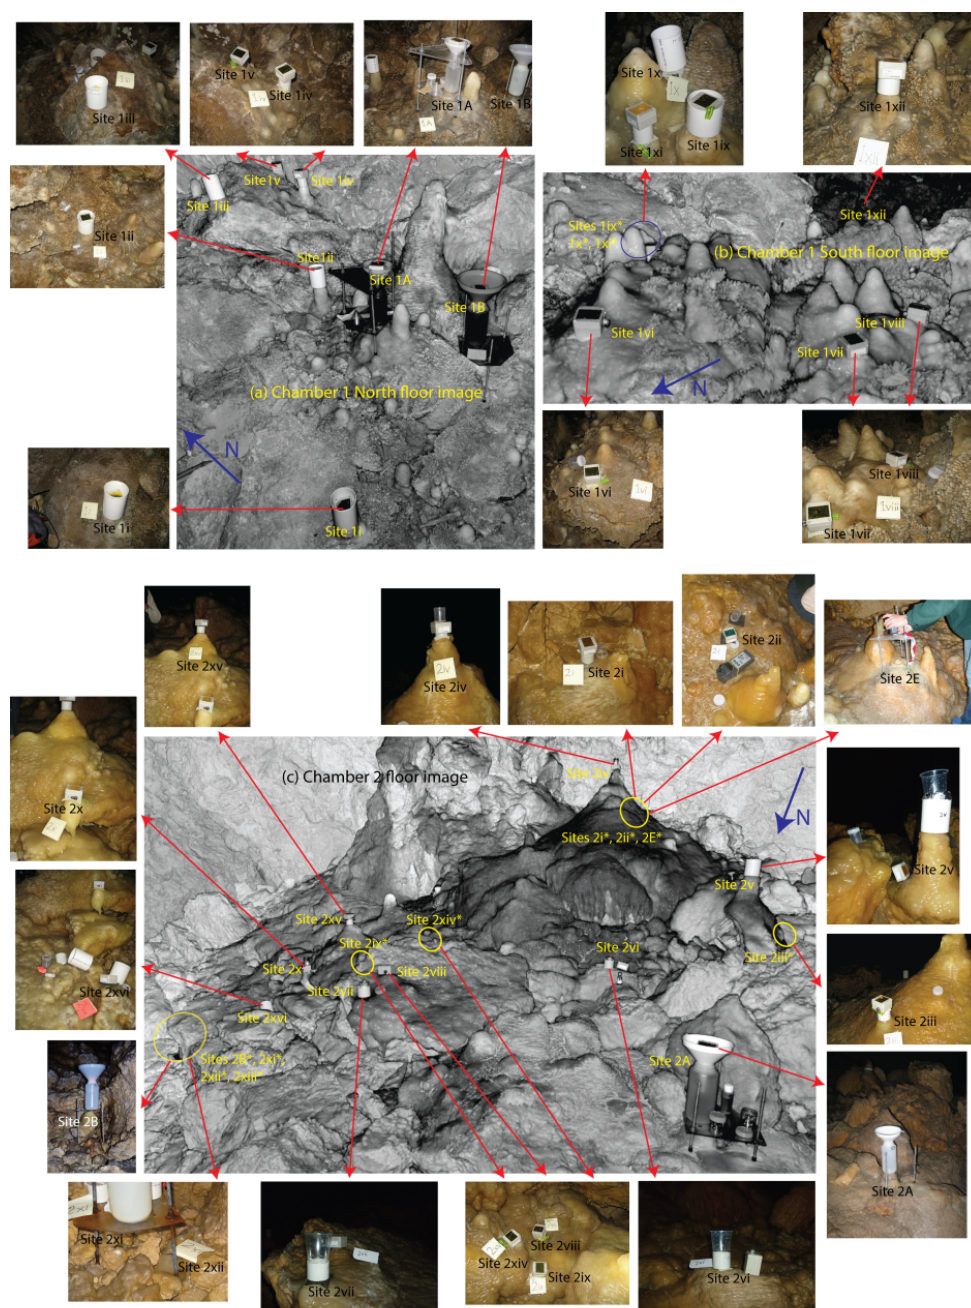

207

208 Figure 3: LiDAR images of drip sites on floor plus photographs of underlying stalagmites. The blue arrows in  
 209 all Figures show the geographic orientation. \* indicates the sites where the stalagmite loggers are not clearly  
 210 visible in the LiDAR floor images as they are obscured by formations in front of them, however the rough



211 locations are marked in yellow circles. Complimentary image of cave ceiling are shown in Fig. 3 of Mahmud et  
212 al. (2016).

#### 213 4 Clustering of similar drip time series

214 One key component in clustering is the function used to measure the temporal similarity (or distance) between  
215 any two time series being compared. To define an appropriate measure of similarity between time series, we  
216 determine two factors: firstly the offset ( $O$ ) to match two time series based on their maximum correlation, and  
217 secondly the complement of the correlation coefficient ( $1-R$ ) between the time series (Jex et al. 2012). Initially,  
218 we compute the cross-correlation function and  $O$  is defined as the lag time based on the maximum correlation  
219 between two time series. Next we define  $R$  as the correlation coefficient with the time series being moved by the  
220 offset amount  $O$  to have maximum correlation coefficient. Finally the distance matrix ( $d$ ) is computed for each  
221 pair of loggers using the following equation (Jex et al. 2012):

$$222 \quad d = O (1 - R)$$

223 Next, MDS is used to translate these distances into a configuration of points defined in an n-dimensional  
224 Euclidean space (Borg and Groenen 1997, Cox and Cox 1994). A MDS results in a set of points arranged so that  
225 their corresponding Euclidean distances indicate the dissimilarities of the time series. The K-Means clustering  
226 algorithm is then used to divide these points into k clusters, which corresponds to a categorization of the drip  
227 data time series. Here we use 4 clusters as this was the number of flow categories identified by Mahmud et al.  
228 (2016).

#### 229 5 Results and Discussion

230 The statistical properties of the drip data (skewness, COV), elevation and LiDAR classified flow type are taken  
231 from Mahmud et al. (2016), Mahmud et al. (2015) are listed in Table 1 and Table 2. Average drip discharges are  
232 calculated from the 15-minute drip rates that appear in Tables 1 and 2 of Mahmud et al (2016). The MDS cluster  
233 groups (analyzed later in section 5.4) are also listed in Table 1 and Table 2.

234 Table 1: Statistical properties of chamber 1 drip data

| Site/Stalagmate | Elevation<br>(ASL m) | Average drip discharge<br>(l/yr) | Skewness | COV   | Flow type      | MDS<br>Group | Cluster |
|-----------------|----------------------|----------------------------------|----------|-------|----------------|--------------|---------|
|                 |                      |                                  |          |       |                |              |         |
| 1A              | 77.46                | 19.8                             | 0.17     | 18.23 | Icicle         | 1            |         |
| 1B              | 77.424               | 12.6                             | -0.03    | 19.93 | Icicle         | 1            |         |
| 1i              | 77.4                 | 6.6                              | 0.13     | 40.31 | Icicle         | 1            |         |
| 1ii             | 77.521               | 11.2                             | -0.06    | 28.09 | Icicle         | 1            |         |
| 1iii            | 77.655               | 8.1                              | -0.29    | 30.52 | Icicle         | 1            |         |
| 1v              | 77.585               | 6.7                              | 1.21     | 40.83 | Soda-<br>straw | 1            |         |
| 1vi             | 77.036               | 7.4                              | 0.1      | 33.83 | Icicle         | 1            |         |
| 1viii           | 77.167               | 60.9                             | 0.38     | 42.49 | Combined       | 2            |         |
| 1ix             | 76.88                | 14.8                             | 0.23     | 21.01 | Icicle         | 1            |         |
| 1x              | 76.9                 | 86.2                             | 0.19     | 28.88 | Fracture       | 3            |         |
| 1xi             | 76.885               | 12.7                             | -0.71    | 48.98 | Icicle         | 1            |         |



235 Table 2: Statistical properties of chamber 2 drip data

| Site/Stalagmate | Elevation (ASL m) | Average drip discharge (l/yr) | Skewness | COV    | Flow type (Mahmud et al. 2016) | MDS Cluster Group |
|-----------------|-------------------|-------------------------------|----------|--------|--------------------------------|-------------------|
|                 |                   |                               |          |        |                                |                   |
| 2A              | 75.48             | 9.4                           | -0.24    | 44.31  | Icicle                         | 1                 |
| 2B              | 73.49             | 17.1                          | 0.2      | 16.01  | Icicle                         | 1                 |
| 2E              | 75.37             | 140.3                         | -0.59    | 6.21   | Combined                       | 3                 |
| 2i              | 72.22             | 243.0                         | 0.31     | 2.57   | Fracture                       | 4                 |
| 2iii            | 75.2              | 4.2                           | -1.64    | 45.62  | Soda-straw                     | 1                 |
| 2iv             | 73.7              | 14.6                          | -0.82    | 13.23  | Icicle                         | 1                 |
| 2v              | 75.75             | 67.8                          | 0.10     | 5.65   | Combined                       | 3                 |
| 2vi             | 75.66             | 985.0                         | 0.44     | 100.95 | Fracture                       | 1                 |
| 2vii            | 75.7              | 25.0                          | 0.03     | 21.63  | Icicle                         | 2                 |
| 2viii           | 73.72             | 113.8                         | -0.11    | 16.11  | Combined                       | 3                 |
| 2ix             | 73.34             | 360.2                         | -0.22    | 8.3    | Fracture                       | 4                 |
| 2x              | 73.59             | 7.0                           | 0.5      | 43.86  | Icicle                         | 1                 |
| 2xi             | 73.5              | 0.6                           | 2.68     | 289.31 | Soda-straw                     | 1                 |
| 2xiii           | 73.54             | 26.2                          | -0.47    | 25.29  | Icicle                         | 2                 |
| 2xiv            | 73.49             | 42.8                          | -0.17    | 11.81  | Icicle                         | 2                 |
| 2xv             | 73.36             | 11.6                          | 0.56     | 21.57  | Icicle                         | 1                 |
| 2xvi            | 73.52             | 266.9                         | 0.17     | 45.28  | Fracture                       | 3                 |
| 2xvii           | 73.72             | 7.0                           | -0.06    | 53.08  | Icicle                         | 1                 |

236

237 **5.1 Histogram plots**

238 We plot drip rate histograms for representative drip sites in Figure 4 for different flow categories. Drip sites are  
 239 organized from lowest to highest discharge in each flow classification (Mahmud et al. 2016). All of the slow  
 240 dripping soda straw types typically fall into two bins only. The lower drip counts (sites 2iii, 1v) indicate the drip  
 241 response of hydrological years 2012 and 2013 until the wet winter, and the higher values direct the consequence  
 242 of the infiltration due to high rainfall events during the entire 2013 winter (April - September). The histograms  
 243 for icicle flow types show unimodal normal distribution, while the combined flow systems represent bimodal  
 244 distributions. The rest of the fracture sites show bimodal or multimodal distributions. With the limited temporal  
 245 scale of the analysis, it seems that the histograms with skewed distribution (sites 1xi, 2vii, 2xiii, 2xiv) actually  
 246 represent the wetter 2013 hydrological year. In contrast, the bimodal distributions indicate the drip response to  
 247 the annual cycle of wet and dry seasons of each hydrological year.

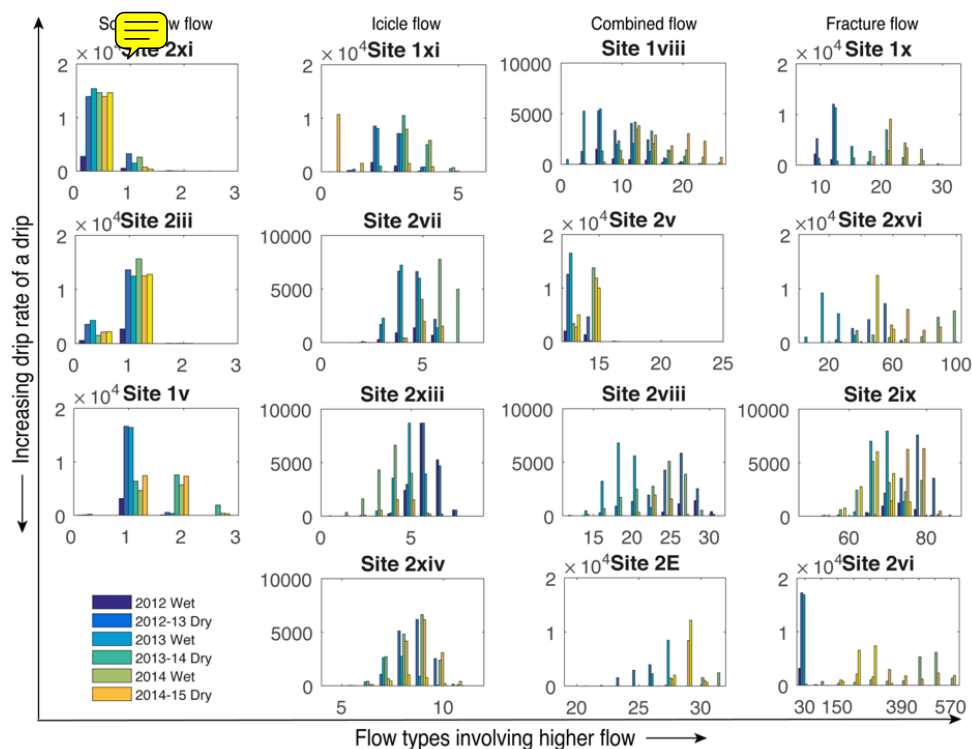

248

249 Figure 4: Histogram plots of both chambers drip data according to four flow types identified by Mahmud et al.  
 250 (2016). The histogram represents the frequency of the drip counts per 15 minutes. Note that the bin size is  
 251 variable because the unit is in drips per 15 minutes and slow drips only take a small number of discrete values,  
 252 in contrast to fast drips for which we can see the entire distribution, including multimodality. The legend shows  
 253 all the seasons over the monitoring period (wet seasons: April to September and dry seasons: October to March).  
 254 2012 wet season had similar to long-term annual mean rainfall event, whereas 2013 was rather wet and 2014  
 255 was a relatively dry year.

## 256 5.2 Autocorrelation functions

257 We plot autocorrelation functions (ACF) for major drip sites in Figure 5 for different flow categories using the  
 258 optimum sampling frequency of 1-day (see next section). All sites have an autocorrelation that persists for at  
 259 least a month, and often much longer. However, there is no relationship between the strength of correlation or  
 260 the time period of the autocorrelation and the flow type. This indicates the presence of ample storage in the  
 261 system, supplying all stalactite types.

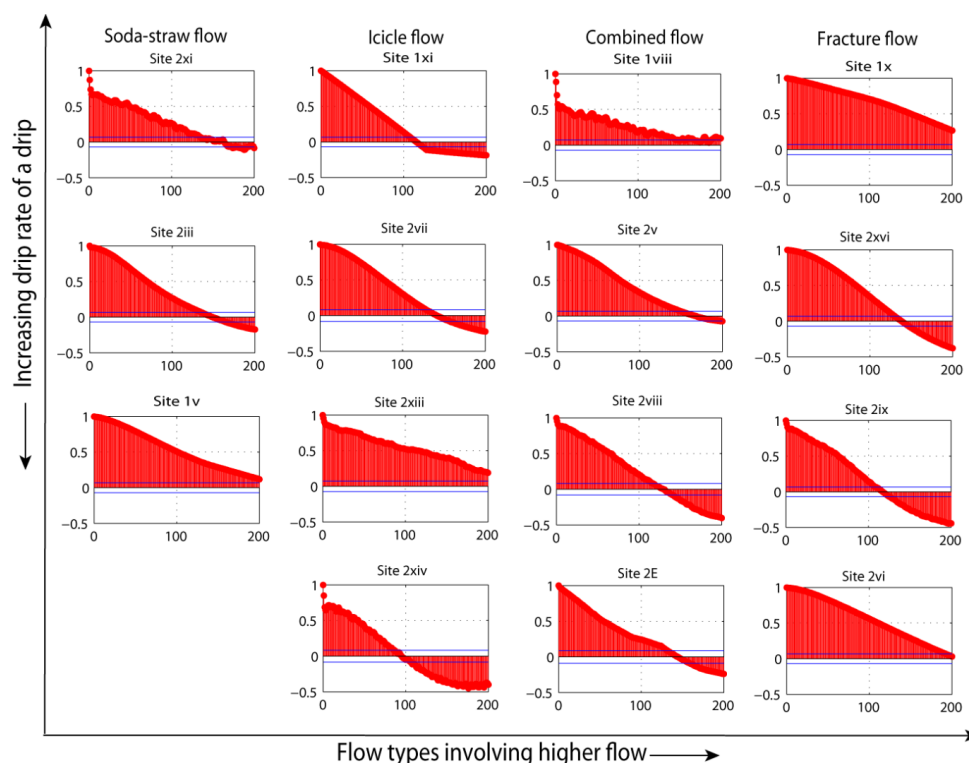

262

263 Figure 5: Autocorrelation functions of both chambers drip data according to flow classification of Mahmud et al.  
 264 (2016). X- and Y-axis of individual plots represents the lag (in days) and ACF respectively.

### 265 5.3 Hydrological classification of cave drips

266 Research involving automated drip monitoring systems is increasing, for example at Cathedral Cave in  
 267 Wellington (Cuthbert et al. 2014) and Harrie Wood Cave in Snowy Mountain, Yarrangobilly (Markowska et al.  
 268 2015). The variability of the drip discharge might not only be a function of discharge itself, but might also  
 269 depend on the sampling frequency. We investigate this possibility in Figure 6 that shows COV versus sampling  
 270 interval, calculated by resampling the data. Figure 6 shows that for high discharge, COV increases with  
 271 sampling frequency, which we explain by the smaller sampling interval better capturing the actual drip  
 272 variability. For low discharges, COV also increases with sampling frequency, which we explain by the  
 273 variability introduced due to drip rates being less than the sampling frequency. From the data presented in  
 274 Figure 6, we can conclude that for both chambers and different types of flow, a sampling frequency of 1 day  
 275 gives the minimum COV, which does not change significantly with a finer sampling frequency. Therefore, we  
 276 use a sampling frequency of 1 day that minimizes sampling artifacts while maximizing the capture of natural  
 277 variability. For Golgotha Cave, this would be to sum the 15 minutes drip rates over a 1-day period. Using this  
 278 optimum sampling frequency of 1-day, we summarize the mean discharge of drip sites in relation to the  
 279 variability in discharge in



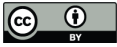

280 Figure 7. These are the same drip discharge parameters as used in the classification method proposed by  
 281 Friederich and Smart (1982), Fairchild et al. (2006) and Baker et al. (1997) that were based on manual drip  
 282 collection at low frequency.

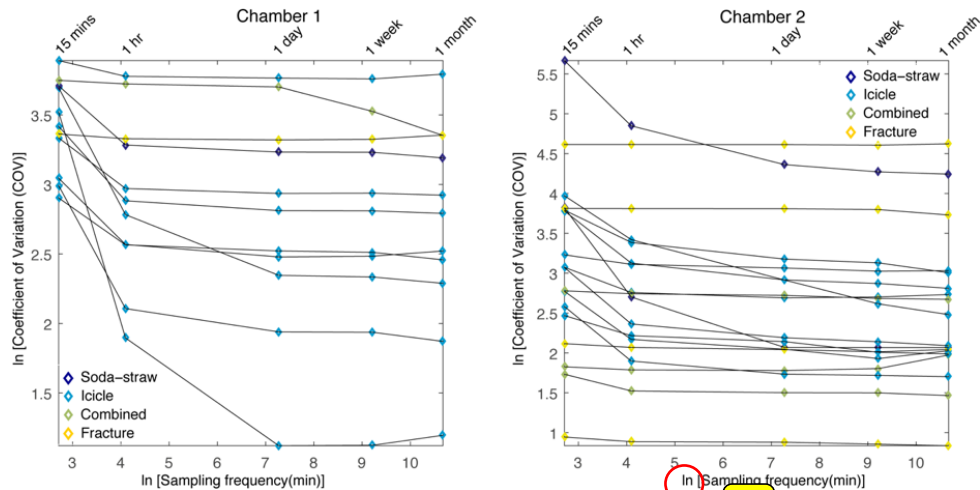

283  
 284 Figure 6: Optimum sampling frequency that minimizes sampling artifacts while maximizing the capture of  
 285 natural variability.

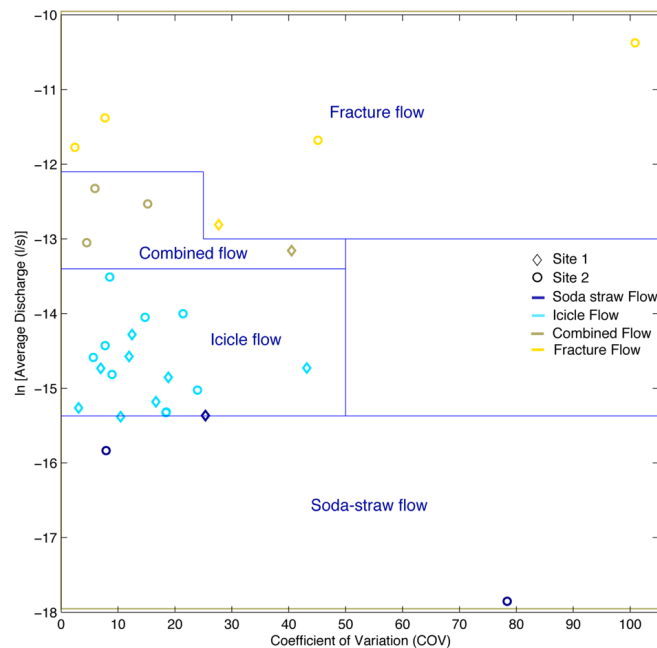

286  
 287 Figure 7: Hydrological behaviour of drip sites expressed in terms of daily mean discharge versus daily discharge  
 288 variability calculated from the automatic drip rate data for three hydrological years. Measured drip rates are



289 converted to volume units assuming a drip volume of 0.1433 ml (Genty and Deflandre 1998). Blue lines reflect  
290 flow classification given in Mahmud et al. (2015).

291 We examine the hydrological behavior of the drips at daily resolution with respect to mean discharge and the  
292 flow variation in 

293 Figure 7. This classification scheme shows that Golgotha Cave drip sites do not fit within the drip classification  
294 method proposed by Smart and Friederich (1987) and Baker et al. (1997), which were based on manual drip  
295 counts with low frequency and limited number of drip sites. It is clear from

296 Figure 7 that there is a broad continuum from soda-straw flow to fracture flow. One soda-straw discharge (site  
297 2xi) has a seasonal dryness, a very low discharge, and a very high coefficient of variation due to its intermittent  
298 dripping. Otherwise, nearly all soda-straw flow, icicle flow and combined flow drips have COV <60%, whereas  
299 fracture flow has a greater COV range, up to 100%. But in general, there is little difference in the COV between  
300 classification types, probably reflecting the dominance of primary porosity at this cave, and the seasonal  
301 variations in discharge related to storage replenishment in winter followed by recession in the periods of soil  
302 moisture deficit. We do not clearly observe increasing variability with decreasing discharge within similar flow  
303 type, in contrast to other studies from older, fractured rock limestones (Baker et al. 1997, Baldini et al. 2006,  
304 Smart and Friederich 1987).

#### 305 **5.4 Clustering of similar drip time series**

306 The clustering results are overlain upon the chamber ceiling images in Figure 8 and also summarized in Tables 1  
307 and 2. As mentioned above, drip logger time series are deemed similar if they are well correlated and only have  
308 a small offset with each other, and so these time series should cluster together. Most of the drip sites that are  
309 identified as matrix flow (soda-straw and icicle flow) cluster together in C1. However, three of the icicle flow  
310 sites with drip rate greater than 4 per 15 minutes fall in C2. The combined flow category and the fracture type  
311 usually cluster in C3 and C4 respectively. Therefore we observe that our clustering generally agrees with the  
312 morphology-based flow classification of Mahmud et al. (2016). Few of the flow classes show exceptions, for  
313 example site 2vi is a fracture type flow and cluster in C1. This site has really high discharge but low variability  
314 in terms of drip rate and shows inconsistency.

315 One consistent feature that appears from the cluster analysis of  Figure 8 is the spatial homogeneity of the  
316 clusters in Chamber 1, suggesting that they are spatially connected and supporting the overall dominant matrix  
317 flow (both soda-straw and icicle) patterns. However, a completely different situation is demonstrated for  
318 Chamber 2. From Chamber 2, it is obvious that drip sites can have similar behavior (well correlated together  
319 with a small lag), and be spatially distinct features, separated by spans of approximately 6m (Figure 8). In  
320 particular, cluster 3 and 4 are spatially scattered, representing the presence of fractures and combined flow  
321 systems throughout the chamber ceiling. This indicates an overall strong heterogeneity of the flow paths  
322 between the surface and the cave for Chamber 2. Hence in Chamber 2, we expect flow paths to be more  
323 complex with potential routing between multiple stores and interconnected fracture networks potentially





324 resulting in non-linear response to infiltration. This is supported by dripwater  $\delta^{18}\text{O}$  data for this chamber (Treble  
 325 et al. 2013).

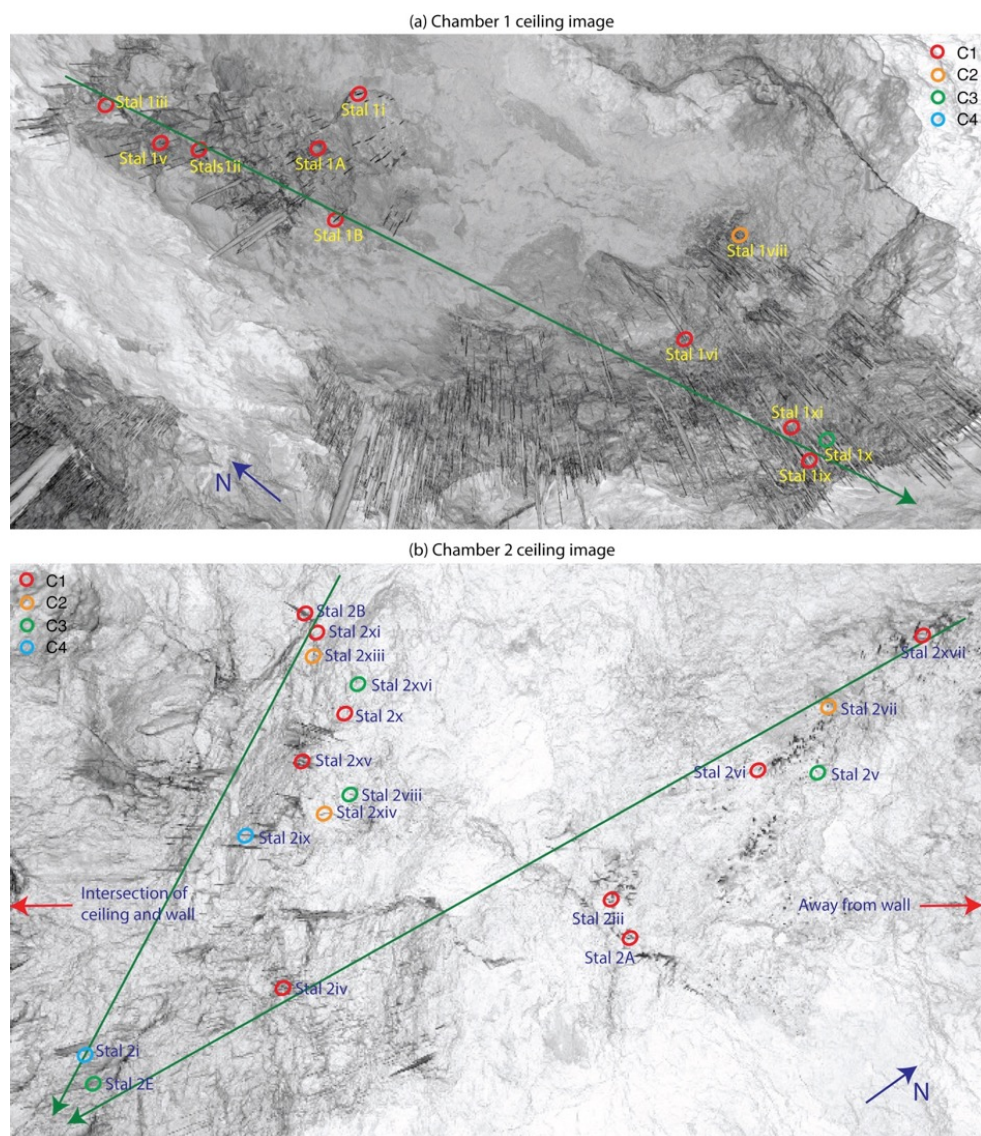

326  
 327 Figure 8: Cluster group plot overlain upon the cave ceiling for both chambers. The ceiling images are captured  
 328 by LiDAR and the circles represent the ceiling locations of stalactites dripping on various stalagmites in both  
 329 chambers (shown in Figure 3). The colour of the circles indicates individual MDS cluster group. The blue  
 330 arrows in both Figures show the geographic orientation and the green arrows represent the approximate transects  
 331 throughout the chambers from higher to lower ceiling elevation.

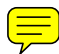

332 **6 Conclusion**

333 Cave drip water response to surface climatic conditions is often complex due to numerous interacting drip routes  
334 with varying response times (Baldini et al. 2006). This study explores the relationship between drip water and  
335 rainfall in a SW Australian karst, where both intra- and inter-annual hydrological variations are strongly  
336 controlled by seasonal variations in recharge. Building on the studies of Mahmud et al. (2015) and Mahmud et  
337 al. (2016), we further analyse a set of statistical properties of three hydrological years of drip data under varying  
338 precipitation rates. The histogram distributions of various drip data time series illustrate a relationship between  
339 the flow classification and surface infiltration. Moreover, we test the relationship between drip discharge  
340 variability and drip data sampling frequency to determine the optimum sampling frequency that maximizes the  
341 capture of natural variability with minimum sampling artifacts. Using the daily optimum sampling frequency,  
342 most of the drip sites show persistent autocorrelation for at least a month.

343 The hydrological behavior of the drips is examined at daily resolution with respect to mean discharge and the  
344 flow variation is similar to the classification method proposed by previous researchers (Baker et al. 1997,  
345 Baldini et al. 2006, Smart and Friederich 1987). The drip sites at Golgotha Cave described in this study do not  
346 fit within the drip classification method proposed by Smart and Friederich (1987) and Baker et al. (1997). These  
347 previous studies were based on manual drip counts with low frequency and limited number of drip sites. Here  
348 we overcome these limitations with high frequency drip signals.

349 Finally, we apply a well-developed clustering method to determine the degree of similarity between drip time  
350 series. The clustering indicates one dominating group: C1 (characterized by matrix flow type) with very slow  
351 continuous drip discharge indicating matrix porosity in the thick limestone formation. This finding concurs with  
352 the observed cave chamber morphology and lithology. Moreover, the cluster analysis agrees with the flow  
353 classification of Mahmud et al. (2016) by grouping similar flow type in one single cluster.

354 Over the last decade, the automation of cave drip water hydrology measurements has permitted the routine  
355 generation of continuous hydrological time series for the first time. This study demonstrates a complete  
356 methodology for such datasets, which will help better characterize karst drip water hydrogeology and  
357 understand the relationship between drip hydrology and surface climate at any cave site where such  
358 measurements are made. We demonstrate that the analysis of the time series produced by cave drip loggers  
359 generates useful hydrogeological information that can be applied generally, beyond the example presented here.  
360 The time series behaviour integrates a variety of characteristics that combine the properties of the epikarst  
361 (storage), fracture configuration, and recharge. The clustering approach can identify which drip behaviour are  
362 related to these cave characteristics, and their spatial relationship. Most importantly, information on cave  
363 characteristics can now be gathered at a very low cost in terms of measurement and time.

364 **Acknowledgment**

365 This paper is based on work supported by UNSW Australia, UNSW Connected Waters Initiative Research  
366 Center and the National Centre for Groundwater Research and Training. The authors wish to thank individuals



367 (Andy Spate, Alan Griffiths, Liz McGuire, Carolina Paice, Anne Wood and others) who assisted in data  
368 acquisition at Golgotha cave site.

369

### 370 **References**

- 371 Arbel, Y., Greenbaum, N., Lange, J. and Inbar, M. (2010) Infiltration processes and flow rates in developed  
372 karst vadose zone using tracers in cave drips. *Earth Surface Processes and Landforms* 35(14), 1682-1693.
- 373 Baker, A., Barnes, W.L. and Smart, P.L. (1997) Variations in the discharge and organic matter content of  
374 stalagmite drip waters in Lower Cave, Bristol. *Hydrological Processes* 11(11), 1541-1555.
- 375 Baldini, J.U.L., McDermott, F. and Fairchild, I.J. (2006) Spatial variability in cave drip water hydrochemistry:  
376 Implications for stalagmite paleoclimate records. *Chemical Geology* 235(3–4), 390-404.
- 377 BoM (2015) Climate Data Online (Station 9547), Bureau of Meteorology Melbourne.  
378 <http://www.bom.gov.au/climate/data/> (Accessed 26-08-2014).
- 379 Borg, I. and Groenen, P. (1997) *Modern multidimensional scaling: theory and applications*, Springer, New  
380 York.
- 381 Brooke, B.P., Olley, J.M., Pietsch, T., Playford, P.E., Haines, P.W., Murray-Wallace, C.V. and Woodroffe, C.D.  
382 (2014) Chronology of Quaternary coastal aeolianite deposition and the drowned shorelines of southwestern  
383 Western Australia – a reappraisal. *Quaternary Science Reviews* 93, 106-124.
- 384 Collister, C. and Matthey, D. (2008) Controls on water drop volume at speleothem drip sites: An experimental  
385 study. *Journal of Hydrology* 358(3–4), 259-267.
- 386 Cox, T. and Cox, M. (1994) *Multidimensional scaling*, Chapman and Hall, London.
- 387 Cuthbert, M.O., Baker, A., Jex, C.N., Graham, P.W., Treble, P.C., Andersen, M.S. and Ian Acworth, R. (2014)  
388 Drip water isotopes in semi-arid karst: Implications for speleothem paleoclimatology. *Earth and Planetary  
389 Science Letters* 395, 194-204.
- 390 Fairchild, I.J., Tuckwell, G.W., Baker, A. and Tooth, A.F. (2006) Modelling of dripwater hydrology and  
391 hydrogeochemistry in a weakly karstified aquifer (Bath, UK): Implications for climate change studies. *Journal  
392 of Hydrology* 321(1–4), 213-231.
- 393 Ford, D. and Williams, P. (2007) *Karst Hydrogeology and Geomorphology*, Wiley.
- 394 Friederich, H. and Smart, P.L. (1982) The classification of autogenic percolation waters in karst aquifers: A  
395 study in G.B. cave, Mendip Hills, England, pp. 143–159.
- 396 Genty, D. and Deflandre, G. (1998) Drip flow variations under a stalactite of the Pere Noel cave (Belgium).  
397 Evidence of seasonal variations and air pressure constraints. *Journal of Hydrology* 211(1-4), 208-232.
- 398 Jex, C.N., Mariethoz, G., Baker, A., Graham, P., Andersen, M., Acworth, I., Edwards, N. and Azcurra, C.  
399 (2012) Spatially dense drip hydrological monitoring and infiltration behaviour at the Wellington Caves, South  
400 East Australia. *International Journal of Speleology* 41(2), 283–296.
- 401 Klimchouk, A. (2004) Towards defining, delimiting and classifying epikarst: Its origin, processes and variants  
402 of geomorphic evolution. *Speleogenesis and Evolution of Karst Aquifers* 2(1), 1-13.
- 403 Lange, J., Greenbaum, N., Husary, S., Ghanem, M., Leibundgut, C. and Schick, A.P. (2003) Runoff generation  
404 from successive simulated rainfalls on a rocky, semi-arid, Mediterranean hillslope. *Hydrological Processes*  
405 17(2), 279-296.

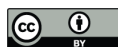

- 406 Liao, T.W. (2005) Clustering of time series data-a survey. *Pattern Recogn.* 38(11), 1857-1874.
- 407 Mahmud, K., Mariethoz, G., Baker, A., Treble, P.C., Markowska, M. and McGuire, L. (2016) Estimation of  
408 deep infiltration in unsaturated limestone environments using cave LiDAR and drip count data. *Hydrol. Earth*  
409 *Syst. Sci.* 20, 359-373.
- 410 Mahmud, K., Mariethoz, G., Pauline, C.T. and Baker, A. (2015) Terrestrial Lidar Survey and Morphological  
411 Analysis to Identify Infiltration Properties in the Tamala Limestone, Western Australia. *Selected Topics in*  
412 *Applied Earth Observations and Remote Sensing, IEEE Journal of* 8(10), 4871 - 4881.
- 413 Mariethoz, G., Baker, A., Sivakumar, B., Hartland, A. and Graham, P. (2012) Chaos in karst percolation.  
414 *Geophysical research letters* 39(L23305).
- 415 Markowska, M., Baker, A., Treble, P.C., Andersen, M.S., Hankin, S., Jex, C.N., Tadros, C.V. and Roach, R.  
416 (2015) Unsaturated zone hydrology and cave drip discharge water response: Implications for speleothem  
417 paleoclimate record variability. *Journal of Hydrology* 529(2), 662–675.
- 418 Raupach, M.R., Briggs, P.R., Haverd, V., King, E.A., Paget, M. and Trudinger, C.M. (2009) Australian Water  
419 Availability Project (AWAP): CSIRO Marine and Atmospheric Research Component: Final Report for Phase 3,  
420 p. 67.
- 421 Scheidt, C. and Caers, J. (2009) Representing spatial uncertainty using distances and kernels. *Mathematical*  
422 *Geosciences* 41(4), 397-419.
- 423 Smart, P.L. and Friederich, H. (1987) Water movement and storage in the unsaturated zone of a maturely  
424 karstified carbonate aquifer, pp. 59-87, *Natural Water Well Association*, Dublin, Ohio.
- 425 Smith, A.J., Massuel, S. and Pollock, D.W. (2012) Geohydrology of the Tamala Limestone Formation in the  
426 Perth Region: Origin and Role of Secondary Porosity, p. 63.
- 427 Treble, P.C., Bradley, C., Wood, A., Baker, A., Jex, C.N., Fairchild, I.J., Gagan, M.K., Cowley, J. and Azcurra,  
428 C. (2013) An isotopic and modelling study of flow paths and storage in Quaternary calcarenite, SW Australia:  
429 implications for speleothem paleoclimate records. *Quaternary Science Reviews* 64(0), 90-103.
- 430 Treble, P.C., Fairchild, I.J., Baker, A., Meredith, K.T., Andersen, M.S., Salmon, S.U., Bradley, C., Wynn, P.M.,  
431 Hankin, S.I., Wood, A. and McGuire, E. (2016) Roles of forest bioproductivity, transpiration and fire in a nine-  
432 year record of cave dripwater chemistry from southwest Australia. *Geochimica et Cosmochimica Acta* 184, 132-  
433 150.
- 434 Treble, P.C., Fairchild, I.J., Griffiths, A., Baker, A., Meredith, K.T., Wood, A. and McGuire, E. (2015) Impacts  
435 of cave air ventilation and in-cave prior calcite precipitation on Golgotha Cave dripwater chemistry, southwest  
436 Australia. *Quaternary Science Reviews* 127, 61–72.
- 437 Williams, P.W. (1983) The role of the subcutaneous zone in karst hydrology. *Journal of Hydrology* 61(1–3), 45-  
438 67.
- 439
